# Supplementary material
Source: PubMed Central journal article supplement (PMC7611933)
Supplement: EMS135863-supplement-Figure_S1_S14__Table_S1__S3.pdf [file EMS135863-supplement-Figure_S1_S14__Table_S1__S3.pdf]

## Supporting Information

### Foliar Delivery of siRNA Particles for Treating Viral Infections in Agricultural Grapevines

*Aviram Avital<sup>1,2,†</sup>, Noy Sadot Muzika<sup>3,†</sup>, Zohar Persky<sup>3,†</sup>, Avishai Karny<sup>1</sup>, Gili Bar<sup>1</sup>, Yuval Michaeli<sup>1</sup>, Jeny Shklover<sup>1</sup>, Janna Shainsky<sup>1</sup>, Haim Weissman<sup>4,\*</sup>, Oded Shoseyov,<sup>3,\*</sup> Avi Schroeder<sup>1,\*</sup>*

#### Figure S1: Sequence design for RdRp

5'- GTTAGCGGTGATGATAGCCTTATATTTAGTCGGCAGCCGTTGGATATTGATACGTCGGTT  
CTGAGCGATAATTTTGGTTTTGACGTAAAGATTTTAAACCAAGCTGCTCCATATTTTGT  
TCTAAGTTTTTAGTTCAAGTCGAGGATAGTCTCTTTTTTGTTCCTCCGATCCACTTAAACTC  
TTCGTTAAGTTTGGAGCTTCCAAAACCTTCAGATATCGACCTTTTACATGAGATTTTTCAA  
TCTTTCGTCG-3'

#### Figure S2: Sequence design for CP

5'-CCAGCGCAAGTGGCGGAACACAGGAAACCGATATAGGGGTAGTGCCGGAATCTGA  
GACTCTCACACCAAATAAGTTGGTTTTCGAGAAAGATCCAGACAAGTTCTTGAAGACT  
ATGGGCAAGGGAATAGCTTTGGACTTGGCGGGAGTTACCCACAAACCGAAAGTTATT  
AACGAGCCAGGGAAAGTATCAGTAGAGGTGGCAATGAAGATTAATGCCGCATTGATG  
GAGCTGTGTAAGAAGGTTATGG-3'

Figure S3: dsRNA-ImPEI encapsulation efficiency

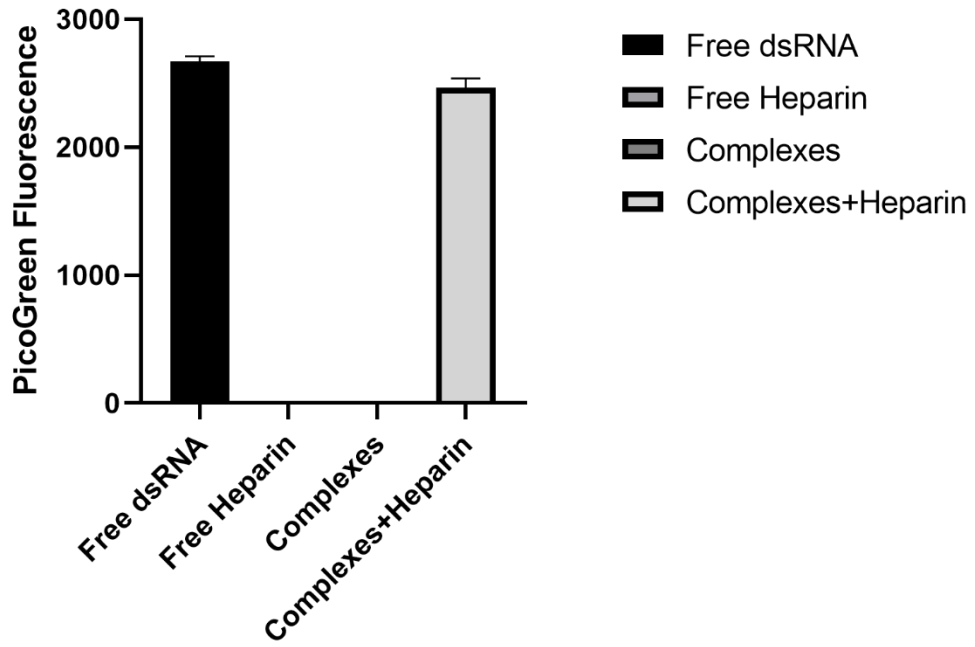

Figure S4: Additional FFT and radial integration

A

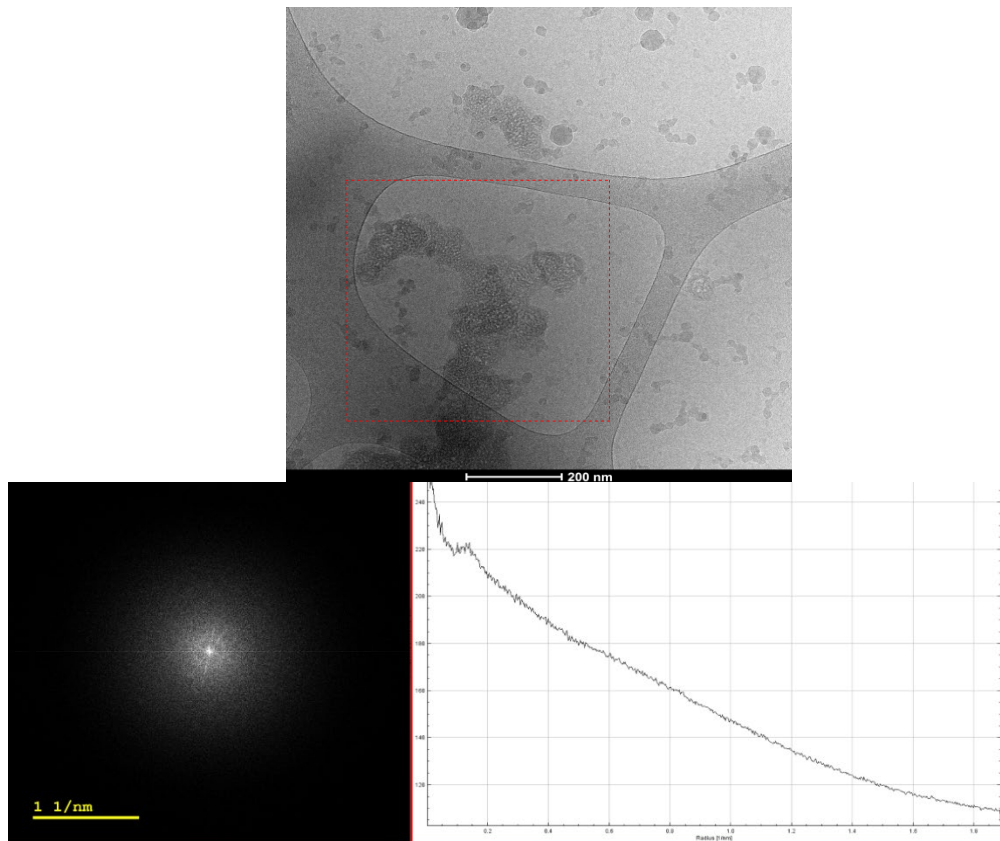

**B**

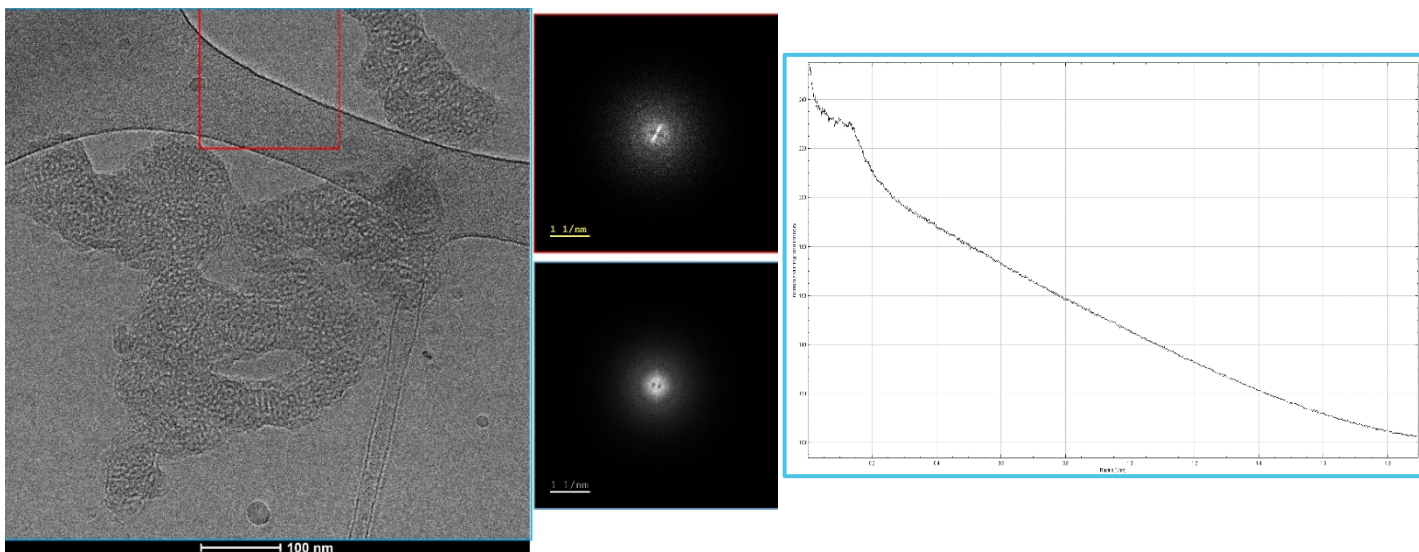

**Figure S5: dsRNA-ImPEI partially energy minimized molecular mechanics model**

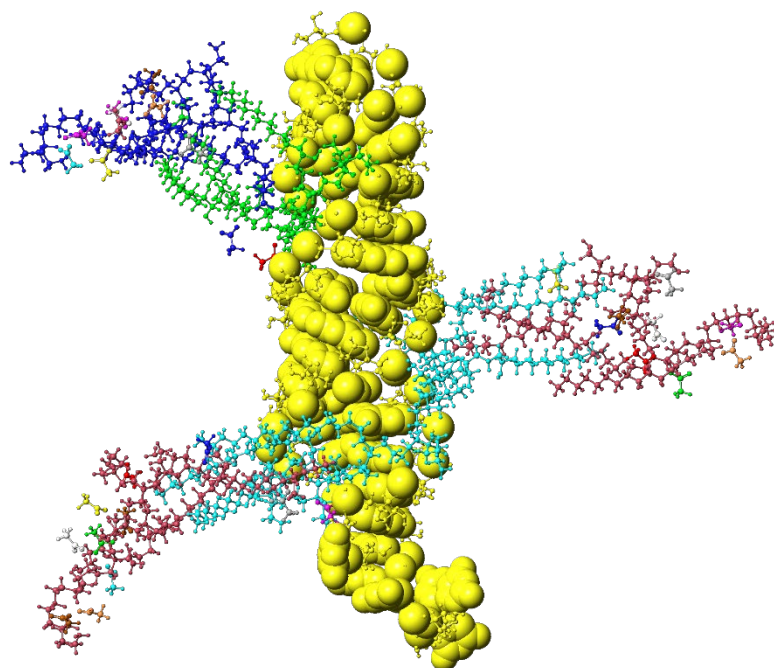

L

Figure S6: Free Cy5 biodistribution

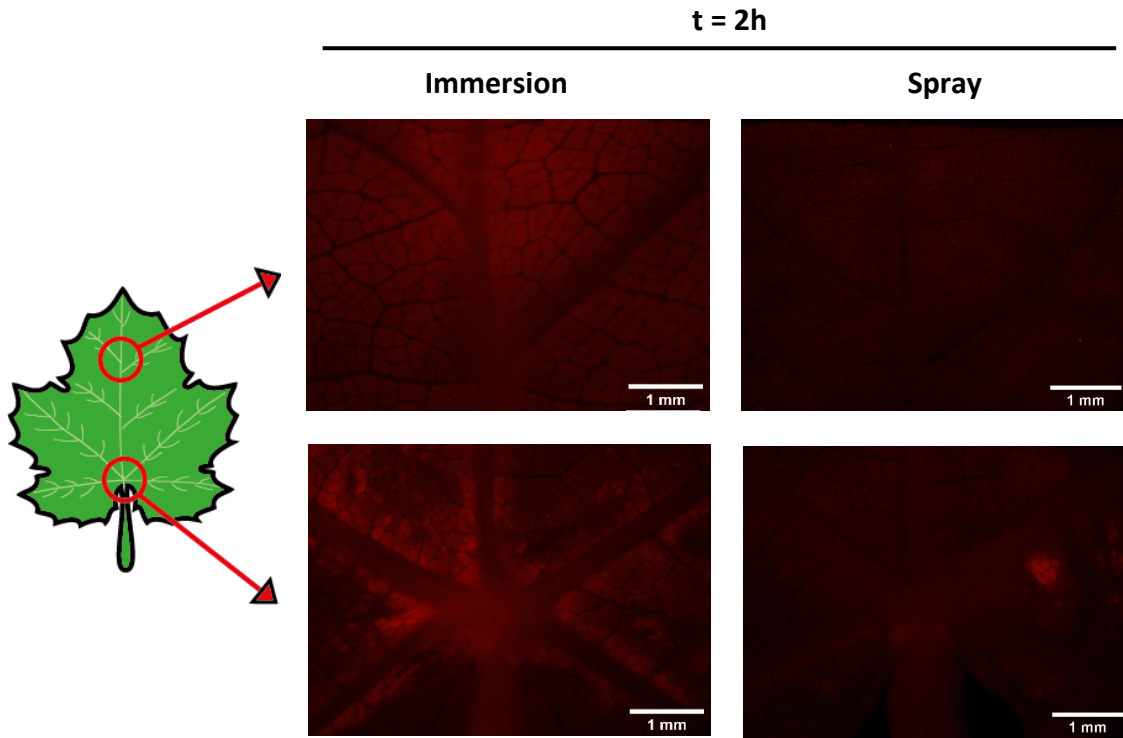

Figure S7: Heparin release assay

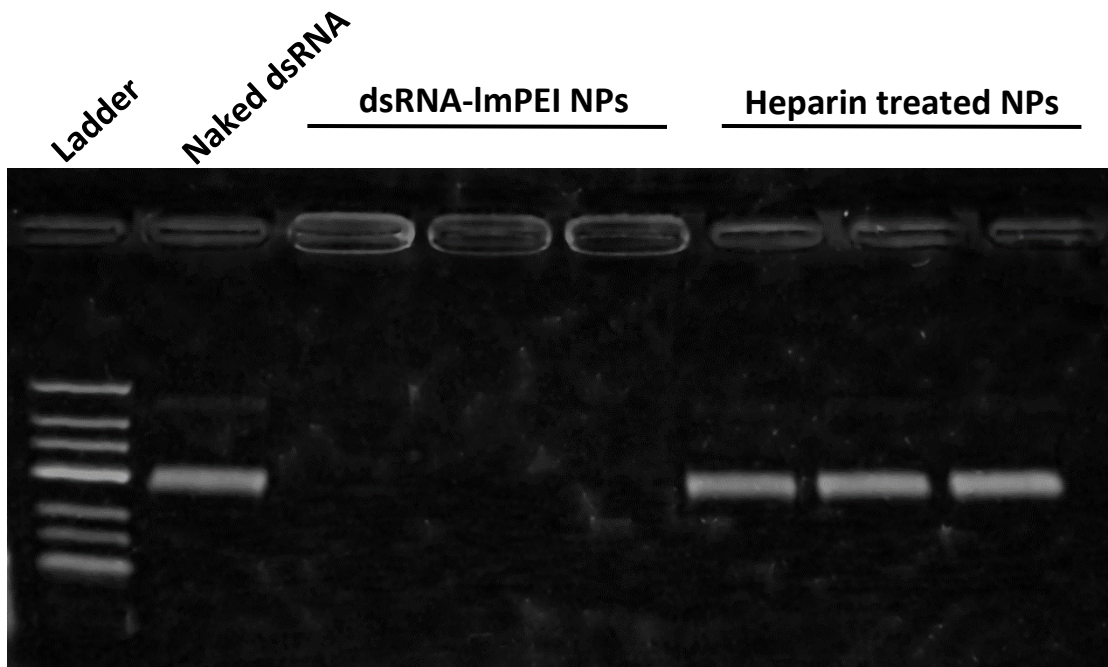

Figure S8: GLRaV3 relative expression in 2019 field experiment

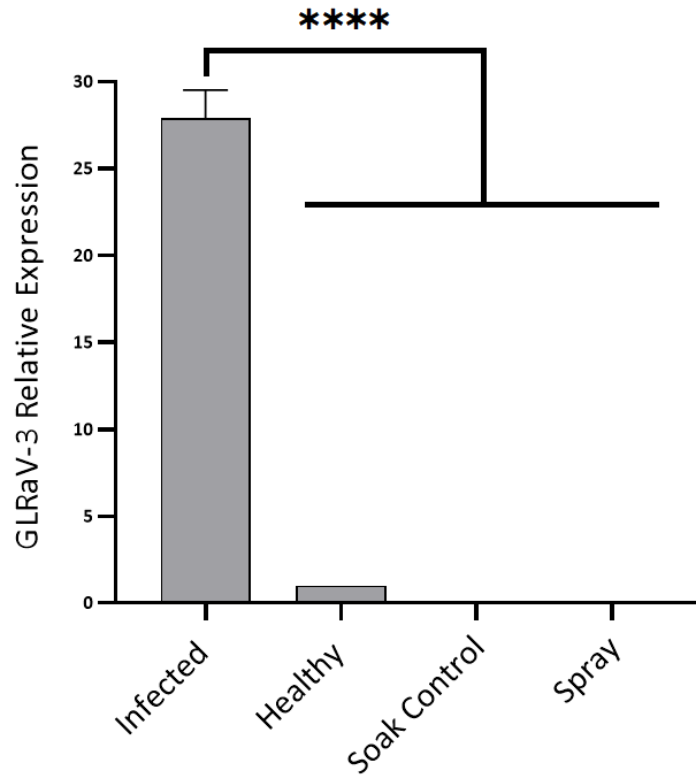

Figure S9: GLRaV3 relative expression throughout 2020 field experiment

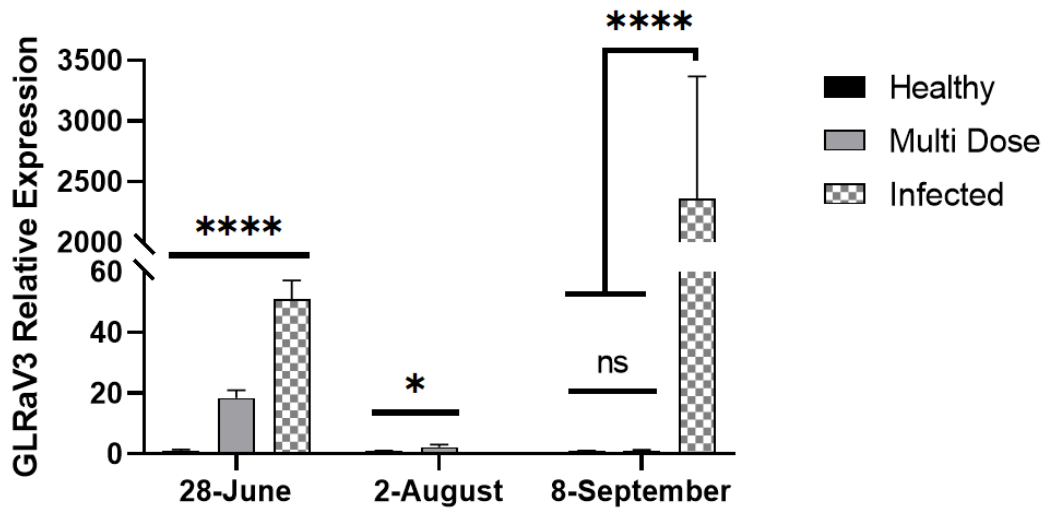

Figure S10: pH after 3, 5 and 8 weeks post treatment in 2019 experiment

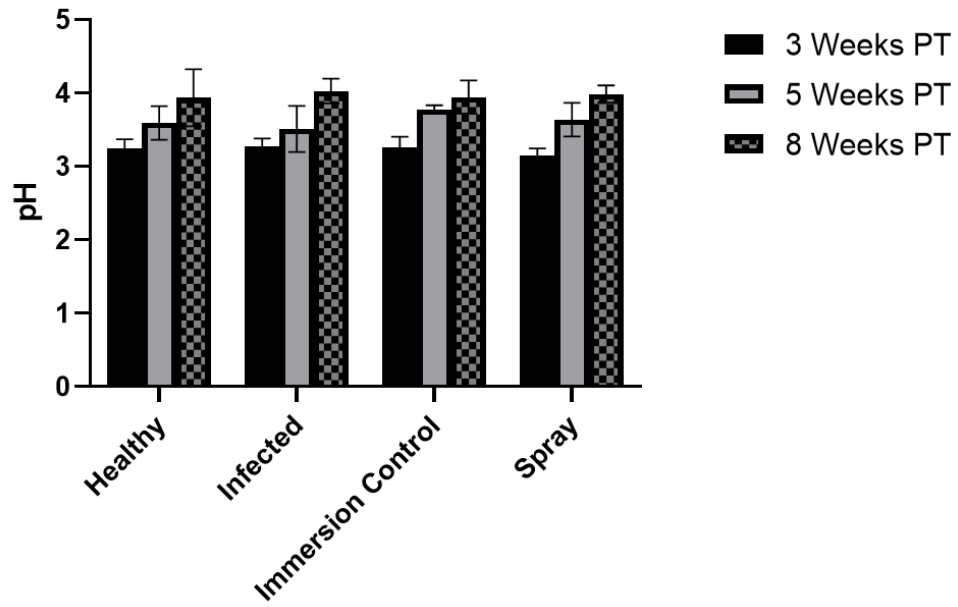

Figure S11: Tannin index after 3, 5 and 8 weeks post treatment in 2019 experiment

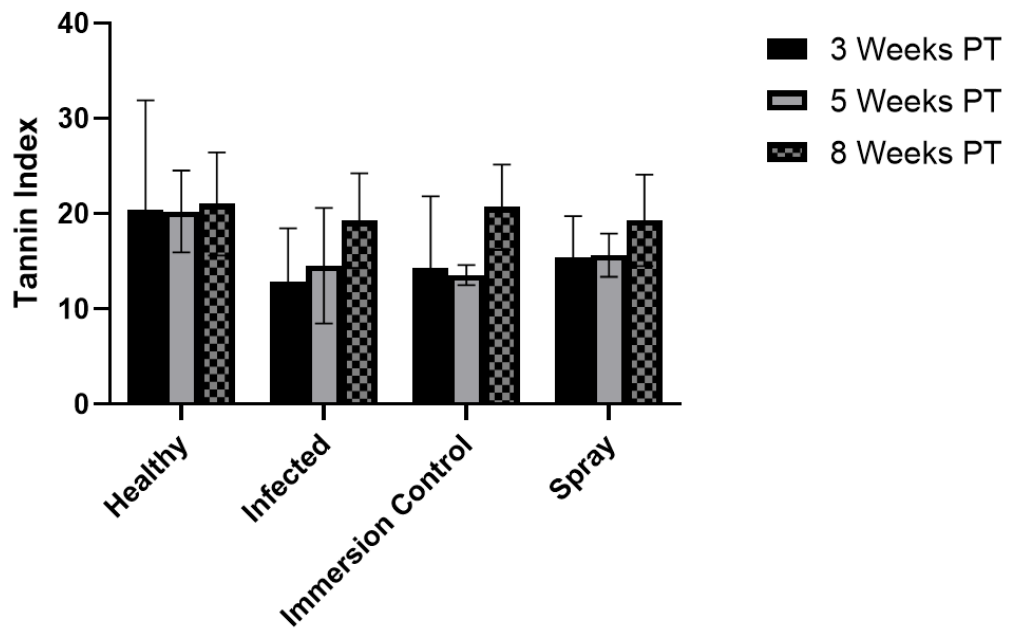

Figure S12: Total acid after 3, 5 and 8 weeks post treatment in 2019 experiment

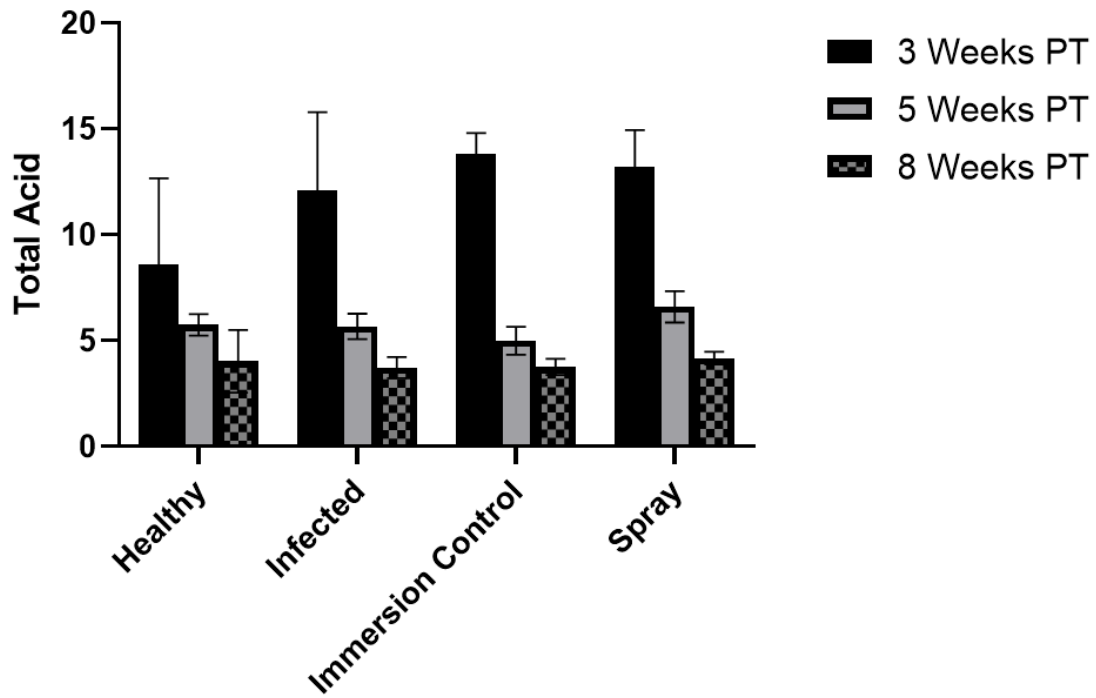

Figure S13: Color density after 3, 5 and 8 weeks post treatment in 2019 experiment

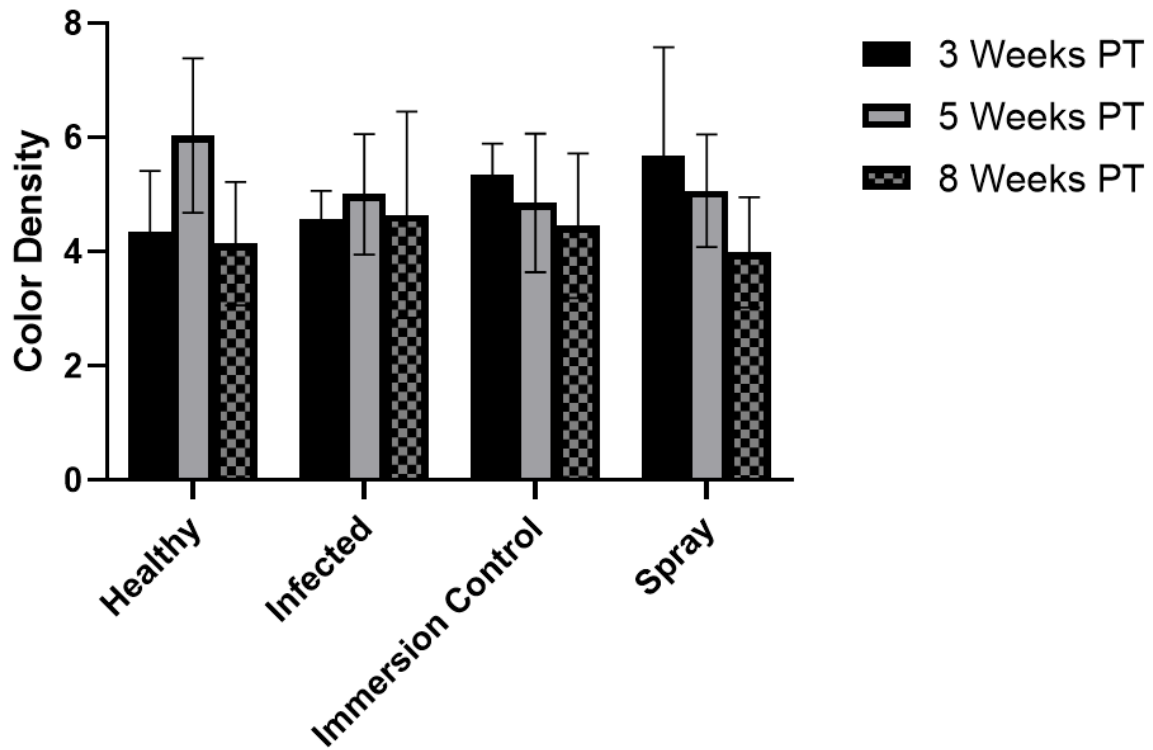

Figure S14: Softness ratio after 3, 5 and 8 weeks post treatment in 2019 experiment

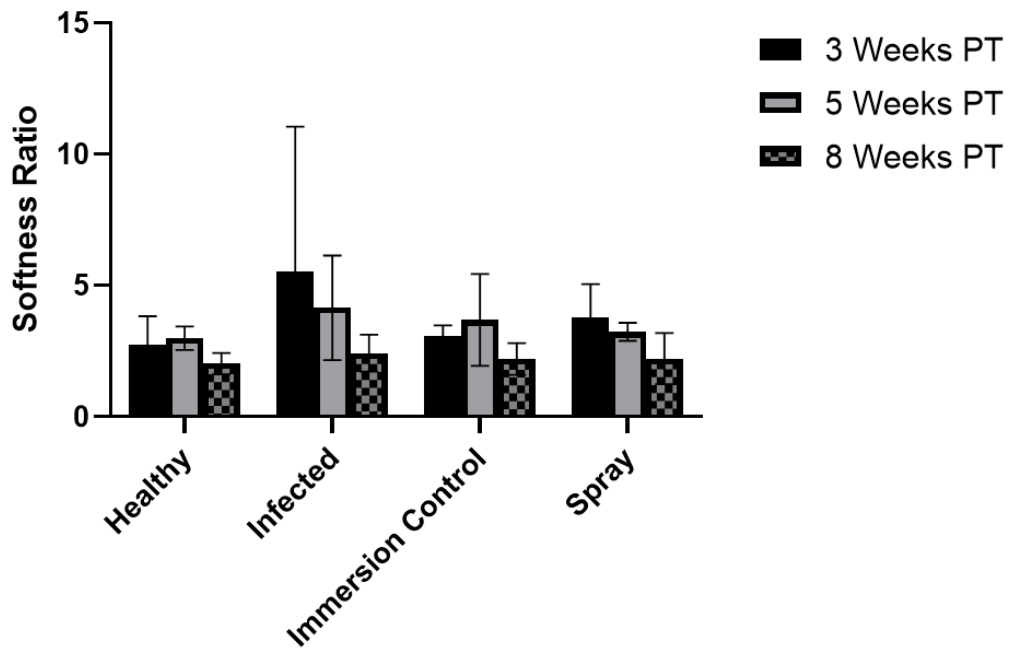

Table S1. Forward and reverse primers for GLRaV strains identification

| Primer Name | Sequence 5' → 3'       |
|-------------|------------------------|
| GLRAV-1_F   | CTAGCGTTATATCTCAAATGA  |
| GLRAV-1_R   | CCCATCACTTCAGCACATAAA  |
| GLRAV-2_F   | TTGACAGCAGCCGATTAAGCG  |
| GLRAV-2_R   | CTGACATTATTGGTGCGACGG  |
| GLRAV-3_F   | CGCTAGGGCTGTGGAAGTATT  |
| GLRAV-3_R   | GTTGTCCCGGTACCAGATAT   |
| GLRAV-4_F   | ACATTCTCCACCTTGTGCTTT  |
| GLRAV-4_R   | CATACAAGCGAGTGCAATTACA |
| GLRAV-7_F   | TATATCCCAACGGAGATGGC   |
| GLRAV-7_R   | ATGTTCTCCACCAAATCG     |
| GLRAV-9_F   | CGGCATAAGAAAAGATGGCAC  |
| GLRAV-9_R   | TCATTCACCACTGCTTGAAC   |



**Table 2. Primer sets used in this study and their amplification efficiencies [26]**

| Primer Name                                           | Sequence 5' → 3'                   | Primer Efficiency |
|-------------------------------------------------------|------------------------------------|-------------------|
| <i>Vitis Vinifera</i> Actin                           | Forward: CTTGCATCCCTCAGCACCTT      | 92.235%           |
|                                                       | Reverse: TCCTGTGGACAATGGATGGA      |                   |
| <i>Vitis Vinifera</i> GAPDH                           | Forward: TTTGGTATTAGGAACCCAGAGGA   | 99.602%           |
|                                                       | Reverse: CAACAACGAACATAGGAGCATCTT  |                   |
| <i>Vitis Vinifera</i> Ef1- $\alpha$                   | Forward: GAACTGGGTGCTTGATAGGC      | 96.0%             |
|                                                       | Reverse: AACCAAAATATCCGGAGTAAAAGA  |                   |
| <i>Grapevine leafroll-associated virus 3</i><br>Hsp70 | Forward: GCYTGTGGRGCTAAGGTTTAC     | 102.432%          |
|                                                       | Reverse: ARCAGGGTATTGGACTRCCTTTTCG |                   |

**Table S3. Infection severity scoring**

| Score                      | 0                                                                                   | 1                                                                                                        | 2                                                                                    | 3                                                                                     | 4                                                                                     |
|----------------------------|-------------------------------------------------------------------------------------|----------------------------------------------------------------------------------------------------------|--------------------------------------------------------------------------------------|---------------------------------------------------------------------------------------|---------------------------------------------------------------------------------------|
| <b>Visual description</b>  |  |                       |  |  |  |
| <b>Literal description</b> | Green leaves without any visible symptoms                                           | Appearance of reddish stains in the interveinal areas of mature leaves near the basal part of the shoots | Symptoms extend upward to other leaves and stains expand                             | Only a narrow part on either side of the main veins remains green                     | Leaves are completely red and margins are curled inwards                              |
